# Supplementary material for: Docosahexaenoic acid inhibits the invasion and migration of colorectal cancer by reversing EMT through the TGF-β1/Smad signaling pathway
Source: Royal Society of Chemistry journal article supplement (doi:10.1039/d4fo02346c), 2024-01-01
Supplement: d4fo02346c2.pdf [file d4fo02346c2.pdf]

1 **Supporting information 1 :**

2

3 **Median number of groups grouped by the least-squares method in a population-**  
4 **based experiment:**

5 Median and interquartile range of DHA intake among the DHA-low and DHA-high  
6 groups categorized based on the minimum *P*-value method

| Outcomes                  | Groups            | Median | <i>P</i> <sub>25</sub> | <i>P</i> <sub>75</sub> |
|---------------------------|-------------------|--------|------------------------|------------------------|
| Metastasis and recurrence | DHA-low (mg/day)  | 9.38   | 5.17                   | 14.37                  |
|                           | DHA-high (mg/day) | 40.49  | 27.59                  | 61.63                  |
| All-cause mortality       | DHA-low (mg/day)  | 9.01   | 5.15                   | 14.12                  |
|                           | DHA-high (mg/day) | 38.24  | 27.03                  | 59.61                  |
| Cancer-specific death     | DHA-low (mg/day)  | 14.01  | 6.81                   | 23.53                  |
|                           | DHA-high (mg/day) | 93.92  | 73.70                  | 138.64                 |

7

8 **Primer sequences :**

9 Primers used in the qPCR reactions were as follows:

10 E-cadherin-forward, 5'-TACACTGCCAGGAGCCAGA-3';

11 E-cadherin-reverse, 5'- TGGCACCCAGTGTCCGGATTA-3';

12 N-cadherin-forward, 5'-CCTGAAGCCAACCTTAAGTACTGAG-3';

13 N-cadherin-reverse, 5'- CTGTGCTTACTGAATTGTCTTGGG -3';

14 Vimentin-forward, 5'- TCAGAGAGAGGAAGCCGAAAAC-3';

15 Vimentin-reverse, 5'- GGAGTTTCTTCAAAAAGGCAATC-3';

16 β-actin-forward, 5'- CTCCATCATGAAGTGTGACG-3';

17 β-actin-reverse, 5'-TGCTTGCTGATCCACATCTG-3';

18 SNAIL1-forward, 5'-TTCTTCTGCGCTACTGCTGCG-3';

19 SNAIL1-reverse, 5'- GGGCAGGTATGGAGAGGAAGA-3';

20 SLUG-forward, 5'-CGCCTCCAAAAGCCAAAC-3';

21 SLUG -reverse, 5'-CGGTAGTCCACACAGTGATG -3';

22 ZEB1-forward, 5'- GGCATACACCTACTCAACTACGG-3';

- 23 ZEB1-reverse, 5'- TGGGCGGTGTAGAATCAGAGTC-3';
- 24 ZEB2-forward, 5'- AATGCACAGAGTGTGGCAAGGC-3';
- 25 ZEB2-reverse, 5'- CTGCTGATGTGCGAACTGTAGG-3';
