# Supplementary figures and images for: Docosahexaenoic acid inhibits the invasion and migration of colorectal cancer by reversing EMT through the TGF-β1/Smad signaling pathway
Source: Royal Society of Chemistry journal article supplement (doi:10.1039/d4fo02346c), 2024-01-01

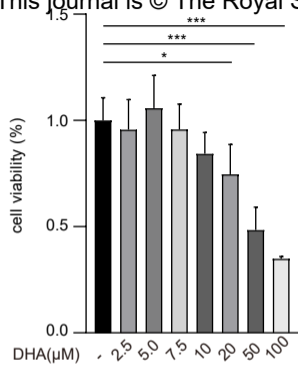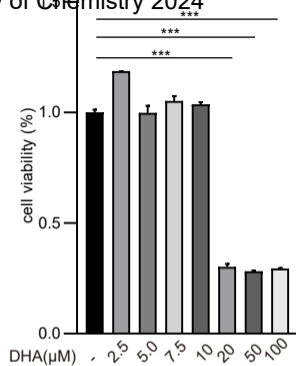

**C**

HCT116

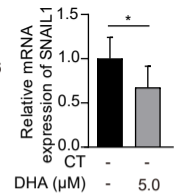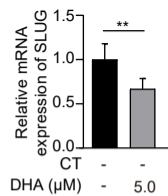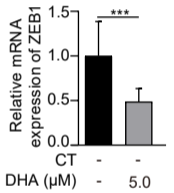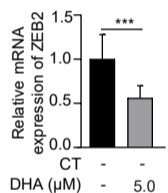

**D**

LoVo

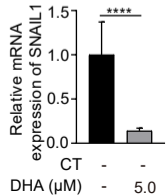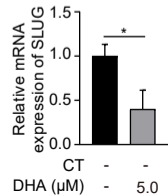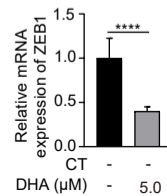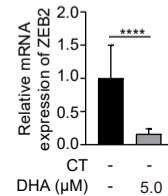

Supplement: d4fo02346c1.pdf [file d4fo02346c1.pdf]
